# Supplementary material
Source: PubMed Central journal article supplement (PMC3965893)
Supplement: supp_mol.113.090076_Supplement_Fig_S1_90076.pdf [file supp_mol.113.090076_Supplement_Fig_S1_90076.pdf]

## Nanomolar Bifenthrin Alters Synchronous $\text{Ca}^{2+}$ Oscillations And Cortical Neuron Development Independent of Sodium Channel Activity

Zhengyu Cao, Yanjun Cui, Hai M. Nguyen, David Paul Jenkins, Heike Wulff, Isaac N. Pessah

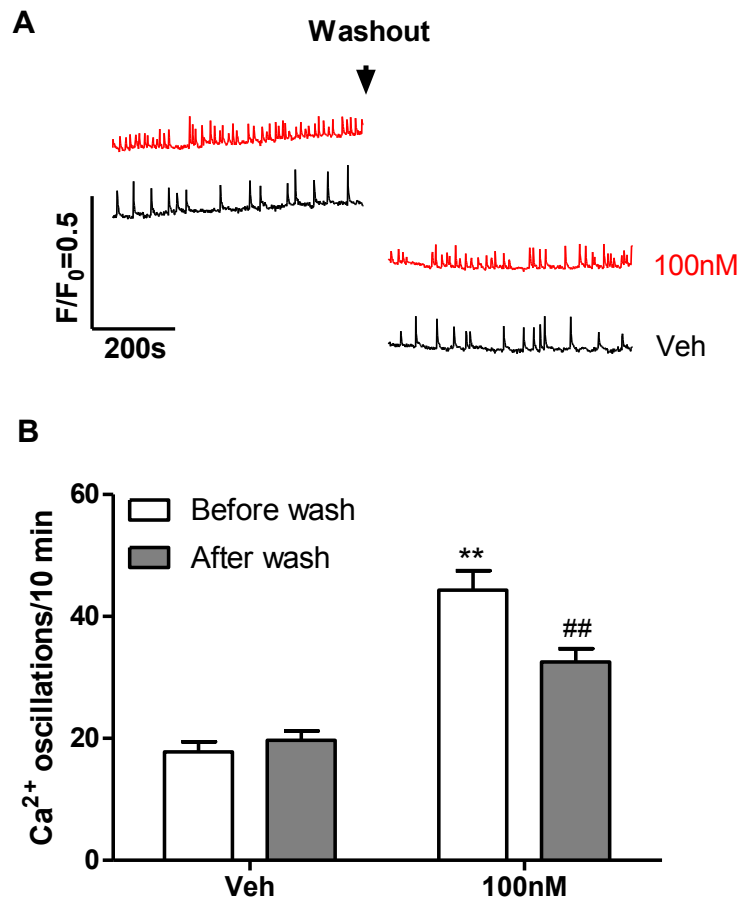

**Supplementary Figure 1** | (A), Representative traces for spontaneous and bifenthrin-augmented  $\text{Ca}^{2+}$  oscillations before and after washout. (B), Quantification of bifenthrin-augmented  $\text{Ca}^{2+}$  oscillations frequency before and after complete wash for 5 times. Complete washout out of bifenthrin produces a partial recovery on the frequency of  $\text{Ca}^{2+}$  oscillations suggesting a persistent response on the spontaneous  $\text{Ca}^{2+}$  oscillations of bifenthrin. Each data point represents Mean $\pm$ SEM ( $n=10$ ) from two experiments each performed in quintuplicates.
